# Supplementary material
Source: Elsevier journal article supplement (https://www.sciencedirect.com/science/article/pii/S0213911122001650)
Supplement: mmc1 [file S0213911122001650:mmc1.doc]

**Apéndice**

**Ejemplos de preguntas extraídas de los guiones de entrevista, en relación con el objetivo del artículo**

**Grupo focal EIR Zona 1**

1. ¿Qué os pareció el curso sobre salud comunitaria que recibisteis?
2. *Relevancia.* ¿Hasta qué punto os parece un tema importante o prioritario para un residente de medicina o enfermería familiar y comunitaria? ¿Qué contenidos os han resultado más interesantes e importantes, y cuáles menos? ¿Por qué?
3. ¿Quién creéis que debería recibir esta formación y realizar el mapeo? ¿Cuándo sería más apropiado realizarlo?

**Entrevista técnico UDM Zona 1**

1. ¿Qué te ha parecido esta iniciativa/este curso sobre salud comunitaria dirigido a residentes? ¿Te parece algo prioritario *(relevancia)* o se trata más bien de una iniciativa que ha venido propuesta desde fuera?

**Entrevista UDM Zona 2**

1. ¿En qué medida crees que el trabajo en salud comunitaria mejora la eficiencia del sistema?
2. ¿Encuentras relación entre la orientación comunitaria de la atención primaria y la desmedicalización de la vida cotidiana? ¿En qué sentido? (Relación con este proyecto)

**Entrevista UDM Zona 5**

1. ¿Cuál sería la mejor forma de garantizar que esta formación en SCBA se siga impartiendo?
2. ¿Cuáles son las dificultades que se identifican desde las UDM?

**Grupo focal profesionales APS Zona 1**

1. ¿Qué os parece que los residentes reciban formación sobre salud comunitaria?
2. ¿Actualmente, creéis que los residentes reciben *suficiente* formación sobre salud comunitaria? ¿Deberían recibir más/menos?
3. ¿Existen *condiciones* adecuadas en atención primaria para que los residentes se formen en salud comunitaria? ¿Barreras? ¿Facilitadores?
4. ¿Cómo creéis que podría *mejorarse* la formación en salud comunitaria de los residentes?
5. ¿En qué medida y cómo creéis que el centro de salud podría beneficiarse de este mapeo de activos? ¿Qué se podría hacer para facilitar la incorporación de los activos identificados a la práctica asistencial diaria?

**Entrevista DS Zona 1**

1. ¿Qué te parece esta iniciativa o este programa formativo sobre sobre SCBA dirigido a residentes? ¿Te parece algo prioritario *(relevancia)*? ¿Por qué? Explorar qué efectos crees que la formación de residentes puede tener tanto en el centro de salud como en la APS en general.
2. ¿Cómo crees que podría fomentarse la formación en salud comunitaria de los residentes?
3. *Sobre el papel de los distritos:* ¿Qué papel crees que pueden desempeñar los distritos de APS en la formación en SCBA de residentes?
4. *Sobre el papel de las UDM:* ¿Y cuál debería ser el papel de las unidades docentes?
5. *Sobre las condiciones en APS:* Y en atención primaria, ¿cuáles crees que son las condiciones que pueden permitir o favorecer una formación en SCBA adecuada para residentes? ¿Existen condiciones adecuadas en atención primaria para que los residentes se formen en salud comunitaria? Si es que no, ¿por qué no? ¿Barreras? ¿Facilitadores?

**Entrevista DS Zona 2**

1. ¿Crees que este proyecto formativo es generalizable al resto de actores de la APS?
2. ¿En qué medida crees que el trabajo en salud comunitaria mejora la eficiencia del sistema?
3. ¿Encuentras relación entre la orientación comunitaria de la APS y la desmedicalización de la vida cotidiana? ¿En qué sentido? (¿Relación con este proyecto?)
